# Supplementary material for: How are reasons for encounter associated with influenza-like illness and acute respiratory infection diagnoses and interventions? A cohort study in eight Italian general practice populations
Source: Springer Nature journal article supplement (doi:10.1186/s12875-021-01519-4), 2021-08-28
Supplement: MOESM2 [file 19608116]

**2013-2014 Seasonal influenza-like illness and acute respiratory illness in eight Italian family practice populations.**

Date of first encounter  Patient

Encounter  Age  Sex  Flu Vaccination

RfE

Procedures

Diagnoses  Chronic Diseases

**Save**

Date of second encounter  Encounter

RfE

Procedures

Diagnoses

Date of third encounter  Encounter

RfE

Procedures

Diagnoses

**Reset**

**Save**
